# Supplementary material
Source: PubMed Central journal article supplement (PMC2938970)

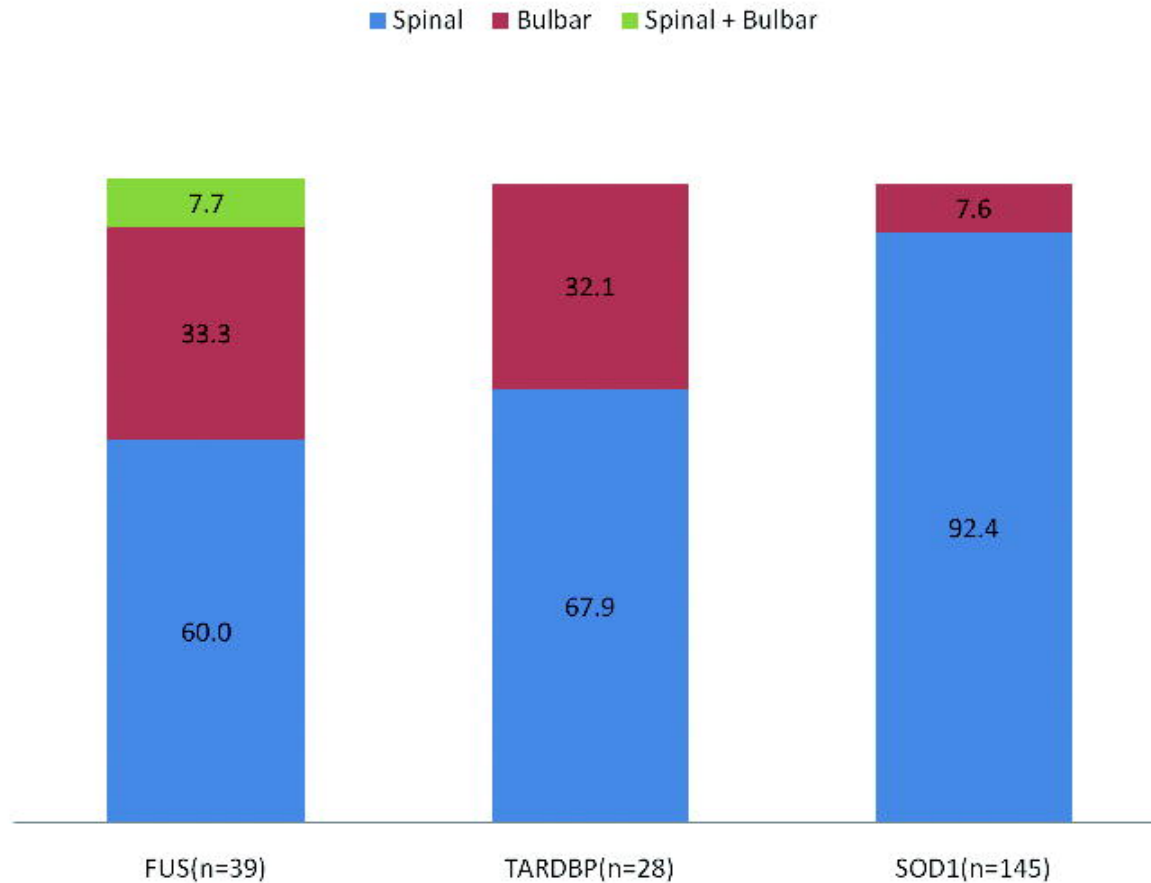

### Comparison of site at symptom onset

Bulbar onset: *FUS* vs *SOD1*,  $p=0.0002$ ; *TDP43* vs *SOD1*  $p=0.0002$ ; *FUS* vs *TDP43*,  $p=0.72$ .

# F8957

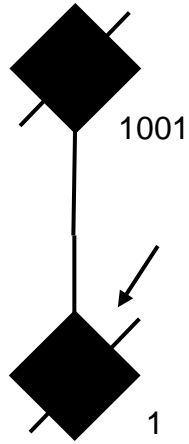

# F8726

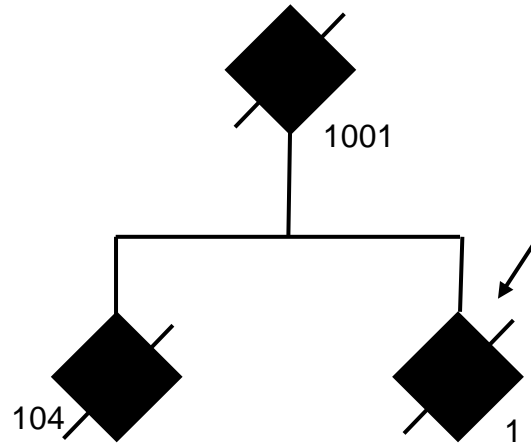

9455

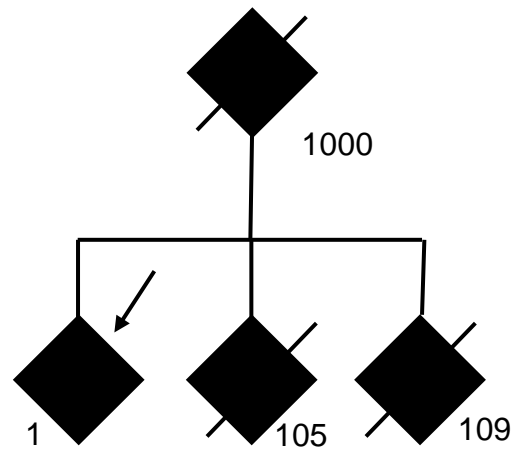

F7083

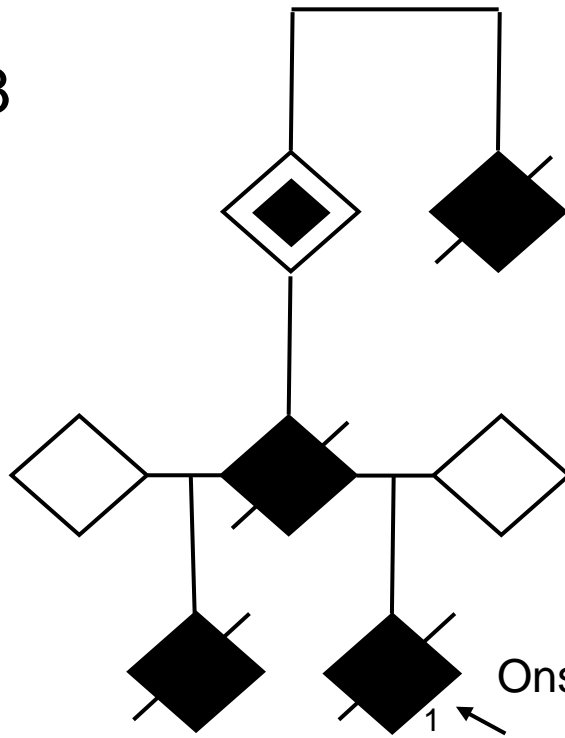

c.1483delC, R495EfsX528

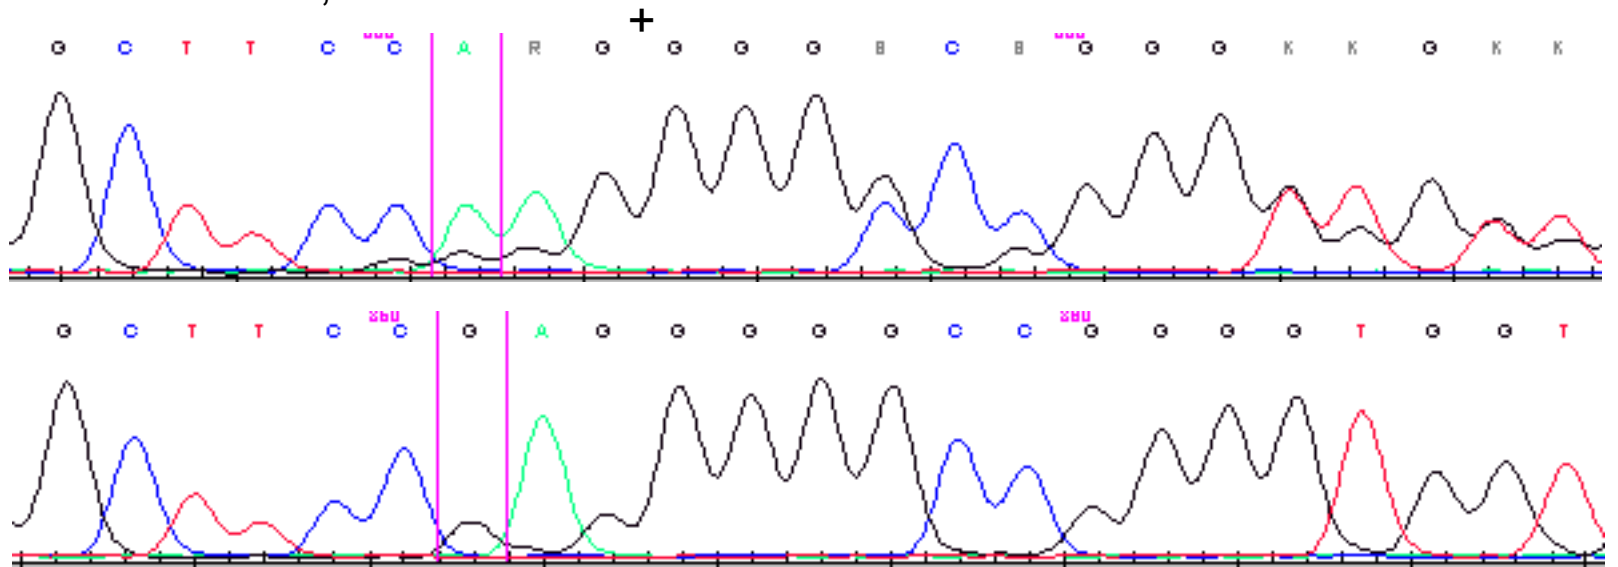

# F8828

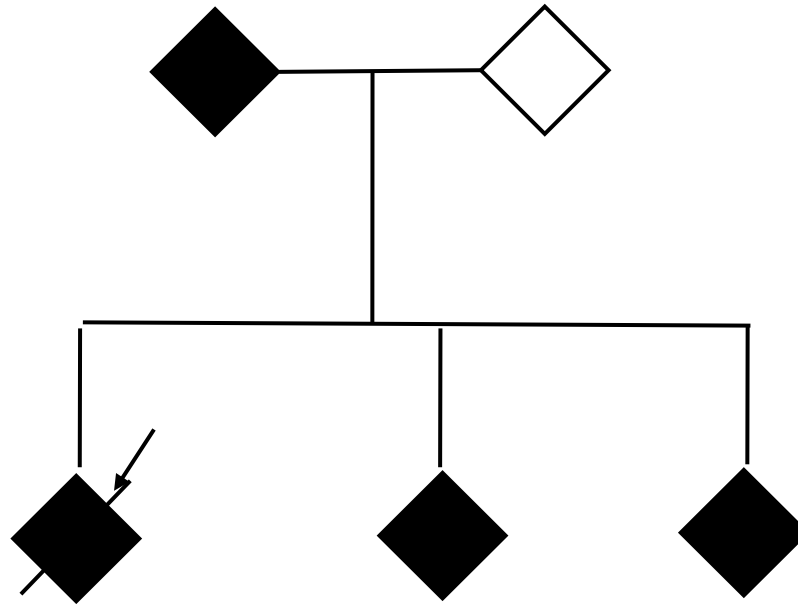

# F7432

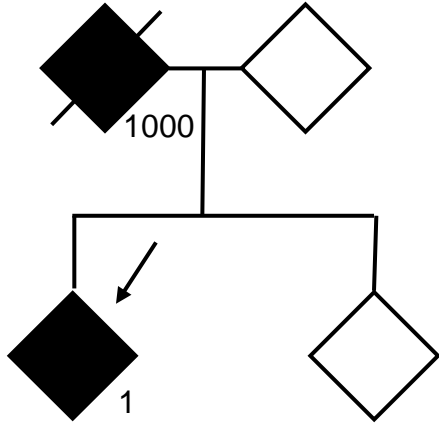

+

A/W age 39

c.1572 G>T, R524S

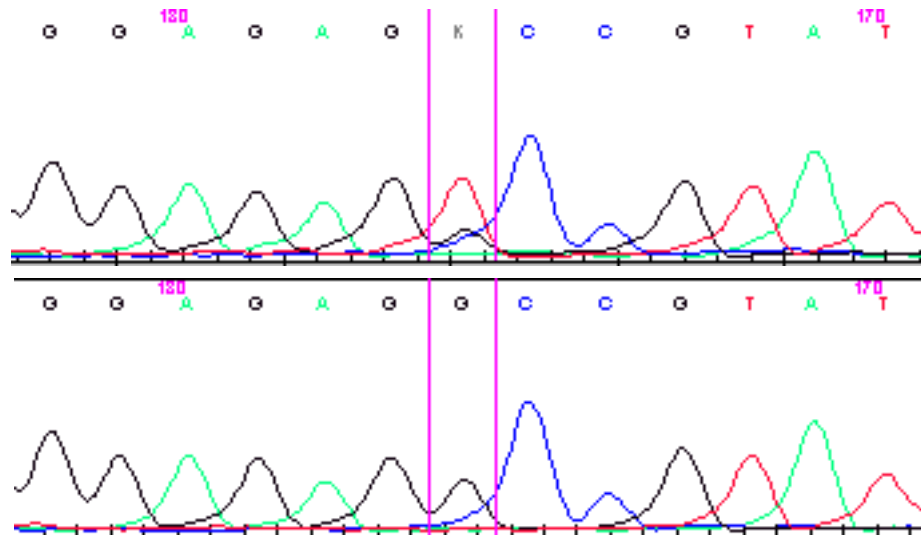

# F9565

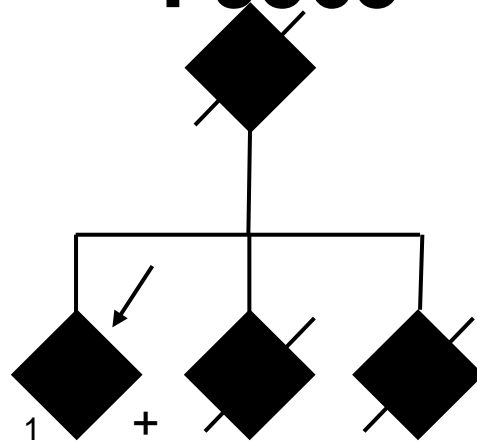

c.1542-2A>T

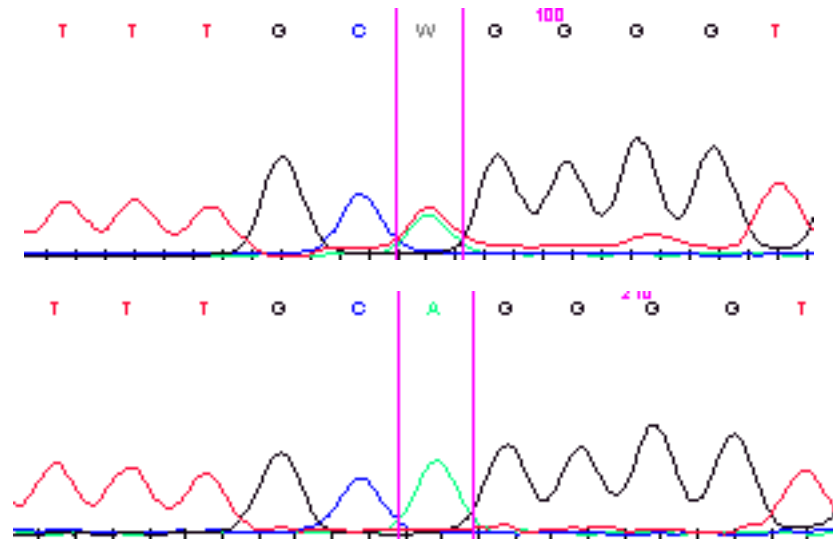



# F7390

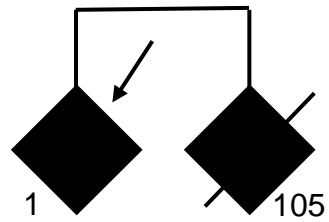

# 7543

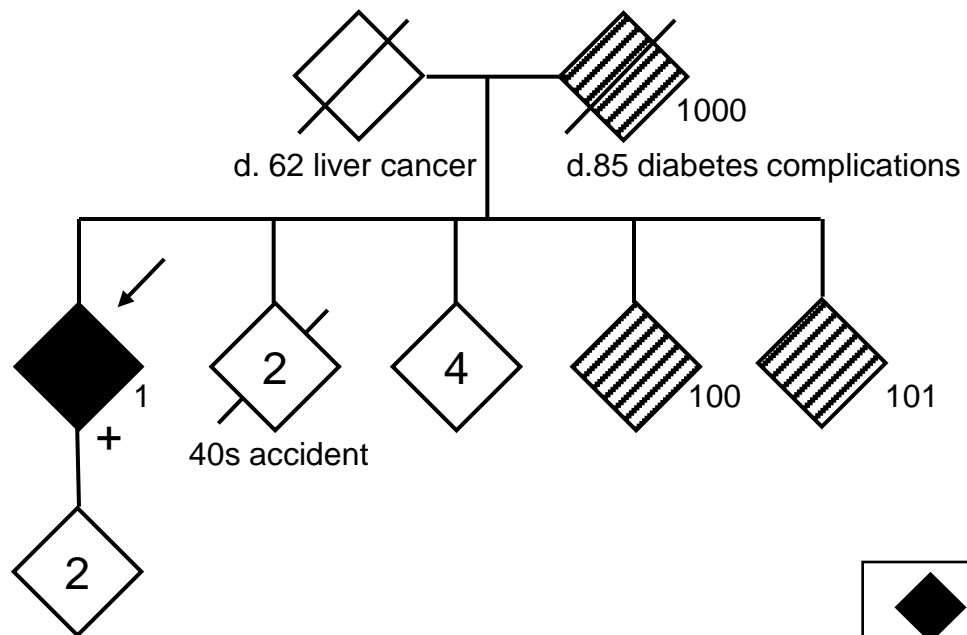

|                                                                                       |                              |
|---------------------------------------------------------------------------------------|------------------------------|
|    | Affected with ALS            |
|  | Dementia/behavioral problems |
| +                                                                                     | G206SL positive              |

# F1090

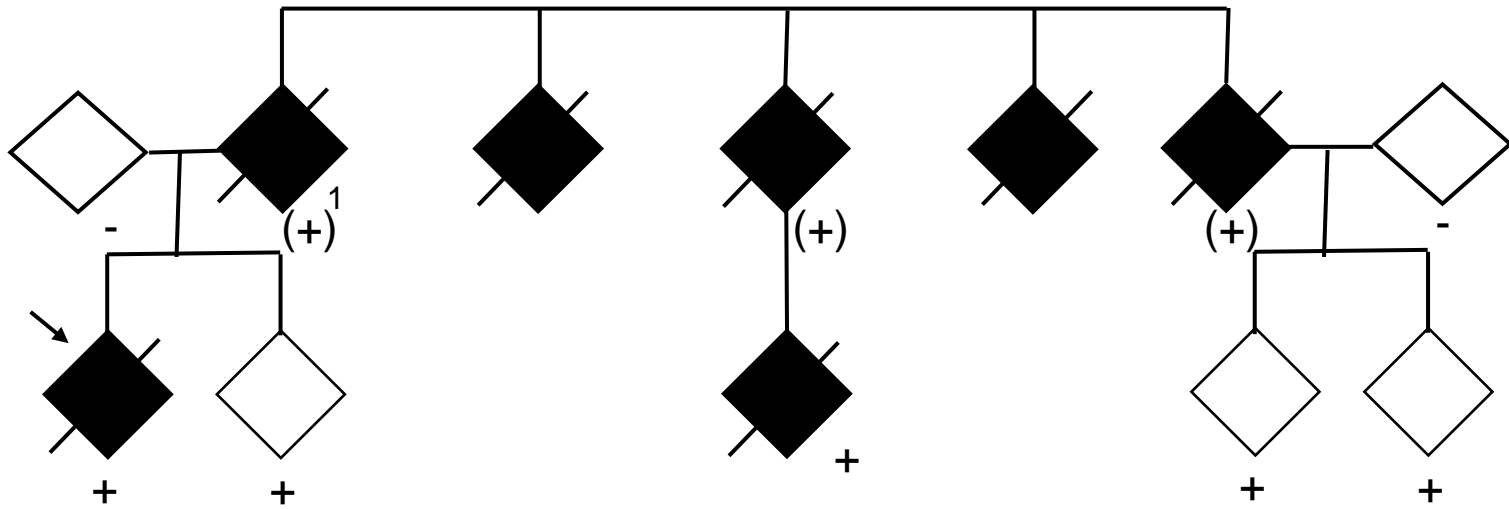

Supplement: WNL.0b013e3181f07e0c_1.pdf [file WNL.0b013e3181f07e0c_1.pdf]
